# Supplementary material
Source: PubMed Central journal article supplement (PMC9175511)
Supplement: NIHMS1806646-supplement-supple_table_1.pdf [file NIHMS1806646-supplement-supple_table_1.pdf]

## Supplementary Table 1. Antibodies

### For IHC

---

| <b>Antibody</b> | <b>Animal Species</b> | <b>Dilution</b> | <b>Source</b>           |
|-----------------|-----------------------|-----------------|-------------------------|
| SLFN11          | Rabbit                | 50x             | #H117570, Sigma-Aldrich |
| SLFN11          | Mouse (E-4)           | 50x             | #sc-374339, Santa Cruz  |
| SLFN11          | Mouse (D-2)           | 50x             | #sc-515071, Santa Cruz  |
| CD8             | Mouse                 | 100x            | #0045896, Novo Castra   |
| CD79a           | Mouse                 | 100x            | #413321, Histofine      |
| CD68            | Mouse                 | 2000x           | #120, Dako              |

---

### For Western blot

---

| <b>Antibody</b> | <b>Animal Species</b> | <b>Dilution</b> | <b>Source</b>             |
|-----------------|-----------------------|-----------------|---------------------------|
| SLFN11          | Rabbit                | 500x            | #H117570, Sigma-Aldrich   |
| SLFN11          | Mouse (E-4)           | 500x            | #sc-374339, Santa Cruz    |
| SLFN11          | Mouse (D-2)           | 500x            | #sc-515071, Santa Cruz    |
| b-Actin         | Mouse                 | 200000x         | #127M4866V, Sigma-Aldrich |
