# Supplementary material
Source: PubMed Central journal article supplement (PMC9175511)
Supplement: NIHMS1806646-supplement-supple_table_2.pdf [file NIHMS1806646-supplement-supple_table_2.pdf]

## Supplementary Table 2. Step-by-step protocol for SLFN11 immunohistochemistry with tips

### Required materials

- Xylene (MUTO PURE CHEMICALS CO., LTD., 43130, #190701)
- Ethanol (MUTO PURE CHEMICALS CO., LTD., 43100, #181228)
- Epitope Retrieval Solution (pH 9.0) (Leica, #6067225)
- Methanol (Wako, #KCK3458)
- 30% hydrogen peroxide (Wako, #KCP6744)
- Foetal bovine serum (Wako, 015-21274)
- 10×TBS (Nacalai Tesque, 12748-31)
- Tween 20 (Wako, 167-11515 #APF2498)
- Mouse monoclonal anti-SLFN11 antibody (Santa Cruz, #sc-515071)
- 10×PBS (-) (Nacalai Tesque, 27575-31)
- Envision+ Single Reagents (HRP. Mouse) (Agilent Dako, K4001, #10151786)
- Simple stain DAB solution (NICHIREI CO., LTD., #H1904)
- Mayer's hematoxylin (MUTO PURE CHEMICALS CO., LTD., 88592)
- Lithium carbonate (Wako, 122-01132)
- Malinol (MUTO PURE CHEMICALS CO., LTD., 2043-2 #190116)
- Distilled water

|    |                                                                                                                                                                                                                                                                                                                                                                           |
|----|---------------------------------------------------------------------------------------------------------------------------------------------------------------------------------------------------------------------------------------------------------------------------------------------------------------------------------------------------------------------------|
| 1  | Formalin-fixed paraffin-embedded tissue sections (4 mm) are deparaffinized with fresh xylene for 5 min 4 times.                                                                                                                                                                                                                                                           |
| 2  | The deparaffinized sections are rehydrated with 100% ethanol, 90% ethanol, and 80% ethanol for 5 min each and then washed with tap water for 5 min.                                                                                                                                                                                                                       |
| 3  | Antigen retrieval is performed by microwave heating in Epitope Retrieval Solution (pH 9.0) (lot # 6067225, Leica) for 15 min in warm mode (500 W) and then for an additional 15 min in defrost mode (200 W). Note: If the solution is evaporated and the water surface goes down after 15 min, the solution needs to be replenished to completely soak the slide glasses. |
| 4  | The sections in hot solution are kept at room temperature for 30 min to cool down.                                                                                                                                                                                                                                                                                        |
| 5  | The sections are washed with tap water for 5 min.                                                                                                                                                                                                                                                                                                                         |
| 6  | Endogenous peroxidase activity is blocked by incubating the sections in 0.3% hydrogen peroxide/50% methanol (distilled water 100 mL + methanol 100 mL + 30% hydrogen peroxide 2 mL) for 10 min.                                                                                                                                                                           |
| 7  | The sections are washed with tap water for 5 min.                                                                                                                                                                                                                                                                                                                         |
| 8  | The sections are blocked with 5% foetal bovine serum/1×TBS for 10 min at room temperature.                                                                                                                                                                                                                                                                                |
| 9  | The sections are washed with tap water for 5 min.                                                                                                                                                                                                                                                                                                                         |
| 10 | The sections are incubated with TBST (1×TBS + 0.5% Tween 20) for 20 min.                                                                                                                                                                                                                                                                                                  |

|    |                                                                                                                                                                                               |
|----|-----------------------------------------------------------------------------------------------------------------------------------------------------------------------------------------------|
| 11 | The sections are incubated with mouse monoclonal anti-SLFN11 antibody (D-2, #sc-515071, Santa Cruz, 1:50 dilution in TBST) for 1 h at room temperature. Note: We use 100 mL for each section. |
| 12 | The sections are briefly washed with PBS (-) 3 times.                                                                                                                                         |
| 13 | The sections are incubated with TBST for 20 min.                                                                                                                                              |
| 14 | The sections are incubated with Envision+ Single Reagents (HRP. Mouse) (Agilent Dako, K4001, #10151786) for 1 h at room temperature. Note: We use 2 drops for each section.                   |
| 15 | The sections are briefly washed with PBS (-) 3 times.                                                                                                                                         |
| 16 | The sections are incubated with TBST for 20 min.                                                                                                                                              |
| 17 | The sections are incubated with Simple stain DAB solution (NICHIREI CO., LTD., #H1904) for 10 min. Note: We use 2 drops for each section.                                                     |
| 18 | The sections are washed with tap water for 5 min.                                                                                                                                             |
| 19 | The sections are counterstained with Mayer's hematoxylin for 40 sec.                                                                                                                          |
| 20 | The sections are washed with tap water for 1 min.                                                                                                                                             |
| 21 | The sections are incubated with 1% lithium carbonate/distilled water (WAKO 122-01132) for 10 sec.                                                                                             |
| 22 | The sections are washed with tap water for 5 min.                                                                                                                                             |
| 23 | The stained sections are placed in 80% ethanol, 90% ethanol, and 100% ethanol for 5 min each.                                                                                                 |
| 24 | The stained sections are dehydrated with fresh xylene 3 times.                                                                                                                                |
| 25 | The sections are mounted with coverslips using Malinol mounting medium.                                                                                                                       |
